# Supplementary material
Source: PubMed Central journal article supplement (PMC3892766)
Supplement: NIHMS543863-supplement-supplement_1.pdf [file NIHMS543863-supplement-supplement_1.pdf]

**Supplementary Table 1.** Yeast strains used in this assay

| Representative name of strain             | Relevant genotype                                          | Source     |
|-------------------------------------------|------------------------------------------------------------|------------|
| wild-type (CG379)                         | MAT $\alpha$ ade5 his7-2 leu2-3 leu2-112 trp1-289 ura3-52  | 1)         |
| <i>pol1L868F</i>                          | CG379 with <i>pol1L868F</i>                                | 1)         |
| <i>pol3-5DV</i>                           | CG379 with <i>pol3-5DV</i>                                 | 2)         |
| <i>pol30K164R</i>                         | CG379 with <i>pol30K164R::LEU2</i>                         | this study |
| <i>pol1L868F pol30K164R</i>               | CG379 with <i>pol1L868F pol30K164R::LEU2</i>               | this study |
| <i>rev3<math>\Delta</math></i>            | CG379 with <i>rev3<math>\Delta</math>::TRP1</i>            | this study |
| <i>pol1L868F rev3<math>\Delta</math></i>  | CG379 with <i>pol1L868F rev3<math>\Delta</math>::TRP1</i>  | this study |
| <i>rad30<math>\Delta</math></i>           | CG379 with <i>rad30<math>\Delta</math>::URA3</i>           | this study |
| <i>pol1L868F rad30<math>\Delta</math></i> | CG379 with <i>pol1L868F rad30<math>\Delta</math>::URA3</i> | this study |
| <i>rad18<math>\Delta</math></i>           | CG379 with <i>rad18<math>\Delta</math>::URA3</i>           | this study |
| <i>pol1L868F rad18<math>\Delta</math></i> | CG379 with <i>pol1L868F rad18<math>\Delta</math>::URA3</i> | this study |

- 1) Niimi, A., Limsirichaikul, S., Yoshida, S., Iwai, S., Masutani, C., Hanaoka, F., Kool, E. T., Nishiyama, Y., and Suzuki, M. (2004) *Mol. Cell. Biol.* **24**, 2734-2746
- 2) Jin, Y. H., Obert, R., Burgers, P. M., Kunkel, T. A., Resnick, M. A., and Gordenin, D. A. (2001) *Proc. Natl. Acad. Sci. USA* **98**, 5122-5127

**Supplementary Table 2.** Types of base substitutions found in *can1* gene <sup>1)</sup>

| base substitutions | WT | <i>rev3Δ</i> | <i>pol11L868F</i> | <i>pol11L868F</i><br><i>rev3Δ</i> | <i>pol11L868F</i><br><i>pol30K164R</i> |
|--------------------|----|--------------|-------------------|-----------------------------------|----------------------------------------|
| total              | 28 | 19           | 24                | 32                                | 26                                     |
| transitions        | 9  | 15           | 10                | 13                                | 4                                      |
| T->C               | 1  | 5            | 2                 | 2                                 | 0                                      |
| C->T               | 3  | 5            | 4                 | 8                                 | 3                                      |
| A->G               | 1  | 4            | 1                 | 0                                 | 0                                      |
| G->A               | 4  | 1            | 3                 | 3                                 | 1                                      |
| transversions      | 19 | 4            | 14                | 19                                | 22                                     |
| T->A               | 0  | 0            | 0                 | 2                                 | 0                                      |
| T->G               | 0  | 0            | 0                 | 0                                 | 0                                      |
| A->T               | 1  | 0            | 5                 | 4                                 | 2                                      |
| A->C               | 2  | 0            | 0                 | 0                                 | 2                                      |
| G->T               | 3  | 1            | 6                 | 7                                 | 12                                     |
| G->C               | 5  | 0            | 1                 | 4                                 | 4                                      |
| C->A               | 4  | 3            | 1                 | 2                                 | 1                                      |
| C->G               | 4  | 0            | 1                 | 0                                 | 1                                      |

1) Mutations are shown as the non-coding sequence for *can1*.

**Supplementary Table 3.** The +1 frameshift mutations found in the *can1* gene.

| Wild-type | $\Delta REV3$ | <i>pol1L868F</i>                                                    | <i>pol1L868F:</i><br>$\Delta REV3$ | <i>pol1L868F:</i><br><i>pol30K164R</i> |
|-----------|---------------|---------------------------------------------------------------------|------------------------------------|----------------------------------------|
| T->2T     | 2C->3C        | 3T->4T<br>3T->4T<br>2G->3G<br>4A->5A<br>6A->7A<br>TGcAAAA<br>CAtGGG |                                    |                                        |

1) Mutations are shown as the non-coding sequence for *can1*. At non-run sequences, inserted nucleotides are shown in small letters.

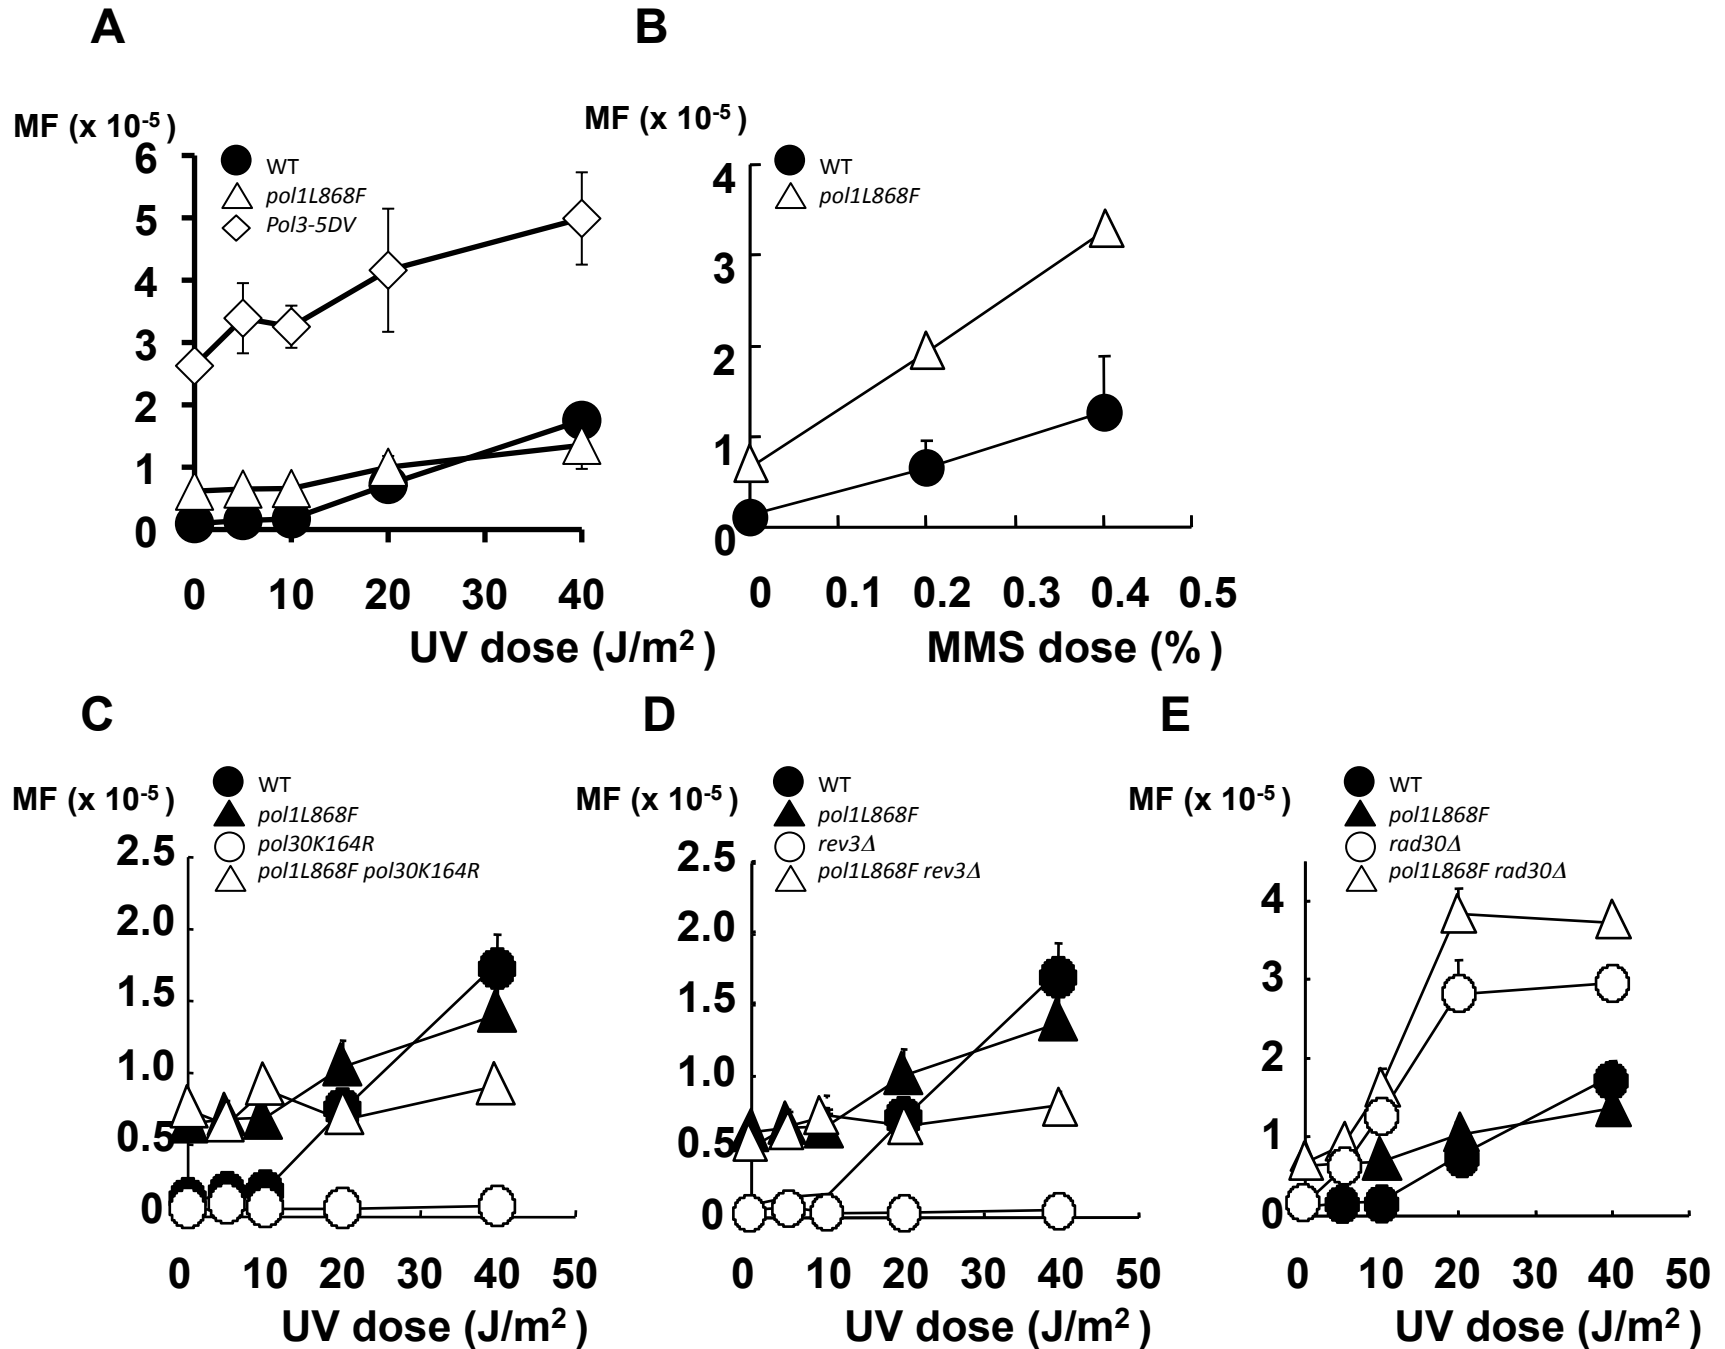

Suzuki et al, Supplementary Figure 1
